# Supplementary material for: Functional Importance of Hydrophobic Patches on the Ebola Virus VP35 IFN-Inhibitory Domain
Source: MDPI journal article supplement (doi:10.3390/v13112316), 2021-11-20
Supplement: s1 [file s1]

**Table S1.** Patch analysis in patch #1

| Mutation | <i>dStability</i> <sup>1</sup> | Difference in patch area <sup>2</sup> |                    |                    | Number of patches |                    |                    |
|----------|--------------------------------|---------------------------------------|--------------------|--------------------|-------------------|--------------------|--------------------|
|          |                                | Hydrophobic                           | Positively charged | Negatively charged | Hydrophobic       | Positively charged | Negatively charged |
| F235F    | 0                              | 0                                     | 0                  | 0                  | 4                 | 8                  | 6                  |
| F235A    | 0.732571702                    | -100                                  | 0                  | 0                  | 3                 | 8                  | 6                  |
| F235R    | 1.006989541                    | -100                                  | 70                 | 0                  | 3                 | 9                  | 6                  |
| F235N    | 1.326652932                    | -90                                   | 0                  | 40                 | 3                 | 8                  | 7                  |
| F235D    | 1.350250176                    | -90                                   | -10                | 80                 | 3                 | 8                  | 8                  |
| F235C    | 0.939680112                    | -40                                   | 0                  | 0                  | 4                 | 8                  | 6                  |
| F235Q    | 0.900006362                    | -100                                  | 0                  | 40                 | 3                 | 8                  | 7                  |
| F235E    | 0.983574176                    | -90                                   | 0                  | 80                 | 3                 | 8                  | 7                  |
| F235G    | 0.505783926                    | -100                                  | 0                  | 0                  | 3                 | 8                  | 6                  |
| F235H    | 1.171110151                    | -100                                  | 0                  | 80                 | 3                 | 8                  | 7                  |
| F235I    | 0.25064059                     | -20                                   | 0                  | 0                  | 4                 | 8                  | 6                  |
| F235L    | 0.371927627                    | -10                                   | 0                  | 0                  | 4                 | 8                  | 6                  |
| F235K    | 1.080934474                    | -100                                  | 80                 | -40                | 3                 | 9                  | 6                  |
| F235M    | 0.431841099                    | -40                                   | 0                  | 40                 | 4                 | 8                  | 7                  |
| F235P    | 6.260009515                    | -90                                   | 0                  | 40                 | 3                 | 8                  | 7                  |
| F235S    | 0.956733005                    | -100                                  | 0                  | 0                  | 3                 | 8                  | 6                  |
| F235T    | 0.951938437                    | -90                                   | 0                  | 40                 | 3                 | 8                  | 7                  |
| F235W    | 0.781937796                    | -10                                   | 0                  | 40                 | 4                 | 8                  | 7                  |
| F235Y    | 0.78841556                     | -10                                   | 0                  | 0                  | 4                 | 8                  | 6                  |
| F235V    | 0.473775789                    | -30                                   | 0                  | 40                 | 4                 | 8                  | 7                  |

<sup>1</sup> *dStability* (kcal/mol) is defined as the change in stability with no amino acid substitution as zero.

<sup>2</sup> The patch area (Å<sup>2</sup>) of VP35 IID with the wildtype amino acid is zero, and the difference in patch area with each amino acid substitution is shown.

**Table S2.** Patch analysis in patch #2

| Mutation | <i>dStability</i> <sup>1</sup> | Difference in patch area <sup>2</sup> |                    |                    | Number of patches |                    |                    |
|----------|--------------------------------|---------------------------------------|--------------------|--------------------|-------------------|--------------------|--------------------|
|          |                                | Hydrophobic                           | Positively charged | Negatively charged | Hydrophobic       | Positively charged | Negatively charged |
| L232L    | 0                              | 0                                     | 0                  | 0                  | 4                 | 7                  | 8                  |
| L232A    | 2.6275545                      | 0                                     | 0                  | 0                  | 4                 | 7                  | 8                  |
| L232R    | 38.611566                      | -20                                   | 40                 | 0                  | 4                 | 7                  | 9                  |
| L232N    | 2.2629841                      | 0                                     | 0                  | 0                  | 4                 | 7                  | 8                  |
| L232D    | 2.5580598                      | 0                                     | 0                  | 10                 | 4                 | 7                  | 8                  |
| L232C    | 2.3945202                      | 0                                     | 0                  | 0                  | 4                 | 7                  | 8                  |
| L232Q    | 2.0728772                      | 0                                     | 0                  | 0                  | 4                 | 7                  | 8                  |
| L232E    | 2.0544426                      | 0                                     | 0                  | 0                  | 4                 | 7                  | 8                  |
| L232G    | 3.6574852                      | 0                                     | 0                  | 0                  | 4                 | 7                  | 8                  |
| L232H    | 2.8965719                      | 0                                     | 0                  | -10                | 4                 | 7                  | 8                  |
| L232I    | 1.4270586                      | 0                                     | 0                  | 0                  | 4                 | 7                  | 8                  |
| L232K    | 4.3843962                      | 0                                     | 0                  | 0                  | 4                 | 7                  | 8                  |
| L232M    | 1.7285597                      | 0                                     | 0                  | 0                  | 4                 | 7                  | 8                  |
| L232F    | 10.723272                      | 20                                    | 0                  | 0                  | 4                 | 7                  | 8                  |
| L232P    | 29.928462                      | 0                                     | 0                  | 0                  | 4                 | 7                  | 8                  |
| L232S    | 2.8143106                      | 0                                     | 0                  | 0                  | 4                 | 7                  | 8                  |
| L232T    | 2.2331049                      | 0                                     | 0                  | 0                  | 4                 | 7                  | 8                  |
| L232W    | 19.4083                        | 20                                    | 0                  | 0                  | 4                 | 7                  | 8                  |
| L232Y    | 11.386522                      | -10                                   | 0                  | 0                  | 4                 | 7                  | 8                  |
| L232V    | 2.0320788                      | 0                                     | 0                  | 0                  | 4                 | 7                  | 8                  |
| A238A    | 0                              | 0                                     | 0                  | 0                  | 4                 | 7                  | 8                  |
| A238R    | 2.0994365                      | -70                                   | 40                 | 0                  | 3                 | 7                  | 9                  |
| A238N    | 0.9907217                      | -20                                   | 0                  | 0                  | 4                 | 7                  | 8                  |
| A238D    | 1.5951034                      | -10                                   | 0                  | 60                 | 4                 | 8                  | 8                  |
| A238C    | 0.8510315                      | 0                                     | 0                  | 0                  | 4                 | 7                  | 8                  |
| A238Q    | 1.5488139                      | -70                                   | 0                  | 0                  | 3                 | 7                  | 8                  |
| A238E    | 2.7834175                      | -20                                   | 0                  | 40                 | 4                 | 8                  | 8                  |
| A238G    | 1.6270258                      | 0                                     | 0                  | 0                  | 4                 | 7                  | 8                  |
| A238H    | 1.9547632                      | -20                                   | 0                  | 60                 | 4                 | 8                  | 8                  |
| A238I    | 5.7143486                      | -10                                   | 0                  | 0                  | 4                 | 7                  | 8                  |
| A238L    | 9.4618888                      | 0                                     | 0                  | 0                  | 4                 | 7                  | 8                  |
| A238K    | 8.2175848                      | -20                                   | 50                 | 0                  | 4                 | 7                  | 8                  |

|       |           |     |    |   |   |   |   |
|-------|-----------|-----|----|---|---|---|---|
| A238M | 1.5190067 | -10 | 0  | 0 | 4 | 7 | 8 |
| A238F | 1.3228297 | 10  | 0  | 0 | 4 | 7 | 8 |
| A238P | 0.5634073 | 0   | 0  | 0 | 4 | 7 | 8 |
| A238S | 0.9860292 | 0   | 0  | 0 | 4 | 7 | 8 |
| A238T | 1.5008972 | 0   | 0  | 0 | 4 | 7 | 8 |
| A238W | 2.0445495 | 40  | 0  | 0 | 4 | 7 | 8 |
| A238Y | 1.1203081 | -10 | 0  | 0 | 4 | 7 | 8 |
| A238V | 2.5027563 | -10 | 0  | 0 | 4 | 7 | 8 |
| F239F | 0         | 0   | 0  | 0 | 4 | 7 | 8 |
| F239A | 1.9057251 | -20 | 10 | 0 | 4 | 7 | 8 |
| F239R | 1.6876262 | -80 | 60 | 0 | 3 | 7 | 9 |
| F239N | 1.8570417 | -70 | 0  | 0 | 3 | 7 | 8 |
| F239D | 2.1112167 | -80 | 0  | 0 | 3 | 7 | 8 |
| F239C | 1.8044742 | -30 | 0  | 0 | 4 | 7 | 8 |
| F239Q | 1.3112751 | -70 | 0  | 0 | 3 | 7 | 8 |
| F239E | 1.760937  | -70 | 0  | 0 | 3 | 7 | 8 |
| F239G | 2.81543   | -30 | 10 | 0 | 4 | 7 | 8 |
| F239H | 1.838075  | -70 | 0  | 0 | 3 | 7 | 8 |
| F239I | 2.1238505 | -10 | 0  | 0 | 4 | 7 | 8 |
| F239L | 0.7491947 | -10 | 0  | 0 | 4 | 7 | 8 |
| F239K | 1.8976756 | -70 | 60 | 0 | 3 | 7 | 9 |
| F239M | 1.3301483 | -10 | 0  | 0 | 4 | 7 | 8 |
| F239P | 6.9946532 | -10 | 0  | 0 | 4 | 7 | 8 |
| F239S | 2.1576557 | -80 | 0  | 0 | 3 | 7 | 8 |
| F239T | 1.7906735 | -30 | 0  | 0 | 4 | 7 | 8 |
| F239W | 1.4098491 | 10  | 0  | 0 | 4 | 7 | 8 |
| F239Y | 0.7401587 | -70 | 0  | 0 | 3 | 7 | 8 |
| F239V | 1.8329102 | 0   | 0  | 0 | 4 | 7 | 8 |
| Q274Q | 0         | 0   | 0  | 0 | 3 | 7 | 8 |
| Q274A | 0.9790117 | 60  | 0  | 0 | 4 | 7 | 8 |
| Q274R | 0.6115132 | 50  | 60 | 0 | 4 | 7 | 9 |
| Q274N | 1.0520914 | 50  | 0  | 0 | 4 | 7 | 8 |
| Q274D | 1.3061332 | 50  | 0  | 0 | 4 | 7 | 8 |
| Q274C | 0.8424939 | 100 | 0  | 0 | 4 | 7 | 8 |
| Q274E | 1.0742681 | 60  | 0  | 0 | 4 | 7 | 8 |
| Q274G | 1.565205  | 70  | 10 | 0 | 4 | 7 | 8 |

|       |           |     |    |     |   |   |   |
|-------|-----------|-----|----|-----|---|---|---|
| Q274H | 1.0874786 | 50  | 0  | 0   | 4 | 7 | 8 |
| Q274I | 0.824607  | 110 | 0  | 0   | 4 | 7 | 8 |
| Q274L | 0.1510161 | 120 | 0  | 0   | 4 | 7 | 8 |
| Q274K | 0.9377139 | 40  | 70 | 0   | 4 | 7 | 9 |
| Q274M | 0.3732078 | 110 | 0  | 0   | 4 | 7 | 8 |
| Q274F | 0.8585927 | 120 | 0  | 0   | 4 | 7 | 8 |
| Q274P | 56.740468 | 100 | 0  | 0   | 4 | 7 | 8 |
| Q274S | 1.2294898 | 50  | 0  | 0   | 4 | 7 | 8 |
| Q274T | 0.8657571 | 90  | 0  | 0   | 4 | 7 | 8 |
| Q274W | 0.9901868 | 140 | 0  | 0   | 4 | 7 | 8 |
| Q274Y | 1.2227983 | 120 | 0  | 0   | 4 | 7 | 8 |
| Q274V | 0.5805623 | 110 | 0  | 0   | 4 | 7 | 8 |
| I278I | 0         | 0   | 0  | 0   | 4 | 7 | 8 |
| I278A | 1.9591054 | -10 | 40 | 0   | 4 | 7 | 8 |
| I278R | 1.3934811 | -90 | 70 | -10 | 3 | 7 | 9 |
| I278N | 1.9687262 | -80 | 40 | 0   | 3 | 7 | 9 |
| I278D | 2.2570228 | -80 | 0  | 60  | 3 | 8 | 8 |
| I278C | 1.9057499 | -10 | 40 | 0   | 4 | 7 | 9 |
| I278Q | 1.6894351 | -80 | 40 | 0   | 3 | 7 | 9 |
| I278E | 1.6783633 | -80 | 0  | 40  | 3 | 8 | 8 |
| I278G | 2.752968  | -30 | 10 | 0   | 4 | 7 | 8 |
| I278H | 1.9107519 | -80 | 0  | 40  | 3 | 8 | 8 |
| I278L | 0.8558835 | -10 | 0  | 0   | 4 | 7 | 8 |
| I278K | 1.5554021 | -30 | 50 | 0   | 4 | 7 | 9 |
| I278M | 0.9461162 | -30 | 0  | 0   | 4 | 7 | 8 |
| I278F | 1.1611346 | -20 | 0  | 0   | 4 | 7 | 8 |
| I278P | 153.5848  | -10 | 0  | 0   | 4 | 7 | 8 |
| I278S | 2.1471819 | -80 | 40 | 0   | 3 | 7 | 9 |
| I278T | 1.6575709 | -80 | 0  | 0   | 3 | 7 | 8 |
| I278W | 1.5097841 | -10 | 0  | -40 | 4 | 6 | 8 |
| I278Y | 1.2976086 | -30 | 0  | 0   | 4 | 7 | 8 |
| I278V | 1.0096868 | -10 | 0  | 0   | 4 | 7 | 8 |

<sup>1</sup> *dStability* (kcal/mol) is defined as the change in stability with no amino acid substitution as zero.

<sup>2</sup> The patch area (Å<sup>2</sup>) of VP35 IID with the wildtype amino acid is zero, and the difference in patch area with each amino acid substitution is shown.

**Table S3.** Patch analysis in patch #3

| Mutation | <i>dStability</i> <sup>1</sup> | Difference in patch area <sup>2</sup> |                    |                    | Number of patches |                    |                    |
|----------|--------------------------------|---------------------------------------|--------------------|--------------------|-------------------|--------------------|--------------------|
|          |                                | Hydrophobic                           | Positively charged | Negatively charged | Hydrophobic       | Positively charged | Negatively charged |
| V245V    | 0                              | 0                                     | 0                  | 0                  | 110               | 4                  | 7                  |
| V245A    | 1.94009808                     | -10                                   | 0                  | 0                  | 4                 | 7                  | 8                  |
| V245R    | 1.73968582                     | -110                                  | 30                 | 0                  | 3                 | 7                  | 8                  |
| V245N    | 1.96042938                     | -10                                   | 0                  | 0                  | 4                 | 7                  | 8                  |
| V245D    | 2.16483607                     | -10                                   | 0                  | 0                  | 4                 | 7                  | 8                  |
| V245C    | 1.804856894                    | 0                                     | 0                  | 0                  | 4                 | 7                  | 8                  |
| V245Q    | 2.52690014                     | 0                                     | 0                  | 0                  | 4                 | 7                  | 8                  |
| V245E    | 4.685006891                    | -60                                   | 0                  | 40                 | 4                 | 8                  | 8                  |
| V245G    | 2.939590088                    | -10                                   | 0                  | 0                  | 4                 | 7                  | 8                  |
| V245H    | 10.29826373                    | -10                                   | 0                  | 0                  | 4                 | 7                  | 8                  |
| V245I    | 1.420383087                    | 0                                     | 0                  | 0                  | 4                 | 7                  | 8                  |
| V245L    | 34.03914758                    | 0                                     | 0                  | 0                  | 4                 | 7                  | 8                  |
| V245K    | 37.98844083                    | -110                                  | 0                  | 0                  | 3                 | 7                  | 8                  |
| V245M    | 2.76672884                     | 0                                     | 0                  | 0                  | 4                 | 7                  | 8                  |
| V245F    | 825.8513853                    | -10                                   | 0                  | 0                  | 4                 | 7                  | 8                  |
| V245P    | 588.9697724                    | 0                                     | 0                  | 0                  | 4                 | 7                  | 8                  |
| V245S    | 2.085385378                    | -10                                   | 0                  | 0                  | 4                 | 7                  | 8                  |
| V245T    | 2.209940464                    | -10                                   | 0                  | 0                  | 4                 | 7                  | 8                  |
| V245W    | 72.62961212                    | 10                                    | 0                  | 0                  | 4                 | 7                  | 8                  |
| V245Y    | 95887186.48                    | -10                                   | 0                  | 0                  | 4                 | 7                  | 8                  |
| K248K    | 0                              | 0                                     | 0                  | 0                  | 4                 | 7                  | 8                  |
| K248A    | 0.095168878                    | -10                                   | -40                | 40                 | 4                 | 8                  | 8                  |
| K248R    | -0.519800474                   | -100                                  | -30                | 40                 | 3                 | 8                  | 8                  |
| K248N    | 0.28260355                     | -10                                   | -50                | 40                 | 4                 | 8                  | 8                  |
| K248D    | 0.6330468                      | -50                                   | -40                | 70                 | 4                 | 8                  | 8                  |
| K248C    | 0.085650141                    | -10                                   | -40                | 40                 | 4                 | 8                  | 8                  |
| K248Q    | 0.29007365                     | -10                                   | -40                | 0                  | 4                 | 7                  | 8                  |
| K248E    | 0.532215671                    | -10                                   | -50                | 70                 | 4                 | 8                  | 8                  |
| K248G    | 0.552775281                    | -10                                   | -40                | 40                 | 4                 | 8                  | 8                  |
| K248H    | 0.291377256                    | -10                                   | -50                | 90                 | 4                 | 9                  | 8                  |
| K248I    | -0.68891395                    | 40                                    | -30                | 0                  | 4                 | 7                  | 8                  |
| K248L    | -0.640784223                   | 30                                    | -40                | 0                  | 4                 | 7                  | 8                  |

|       |              |     |     |     |   |   |   |
|-------|--------------|-----|-----|-----|---|---|---|
| K248M | -0.248851966 | 10  | -40 | 40  | 4 | 8 | 8 |
| K248F | 0.100037599  | 50  | -40 | 0   | 4 | 7 | 8 |
| K248P | 981.5469749  | -10 | -40 | 40  | 4 | 8 | 8 |
| K248S | 0.242675293  | -10 | -40 | 40  | 4 | 8 | 8 |
| K248T | 0.006153339  | -10 | -40 | 0   | 4 | 7 | 8 |
| K248W | -0.990039757 | 80  | -20 | 40  | 5 | 8 | 8 |
| K248Y | -0.814420669 | 20  | -30 | 40  | 4 | 8 | 8 |
| K248V | -0.391183967 | 20  | -40 | 0   | 4 | 7 | 8 |
| L249L | 0            | 0   | 0   | 0   | 4 | 7 | 8 |
| L249A | 2.055125935  | -20 | 0   | 0   | 4 | 7 | 8 |
| L249R | 1.255585451  | -30 | 0   | -10 | 4 | 7 | 8 |
| L249N | 1.910848759  | -30 | 0   | 0   | 4 | 7 | 8 |
| L249D | 1.984240956  | -50 | 0   | 40  | 4 | 8 | 8 |
| L249C | 1.941255393  | 0   | 0   | 0   | 4 | 7 | 8 |
| L249Q | 1.744715848  | -40 | 0   | -10 | 4 | 7 | 8 |
| L249E | 1.946672273  | -40 | 0   | 30  | 4 | 7 | 8 |
| L249G | 2.884809407  | -20 | 0   | 0   | 4 | 7 | 8 |
| L249H | 1.687257971  | -30 | 0   | 30  | 4 | 7 | 8 |
| L249I | 1.278723454  | 0   | 0   | 0   | 4 | 7 | 8 |
| L249K | 1.786890975  | -20 | 0   | -10 | 4 | 7 | 8 |
| L249M | 1.29713662   | -20 | 0   | 0   | 4 | 7 | 8 |
| L249F | 0.750303334  | 10  | 0   | 0   | 4 | 7 | 8 |
| L249P | 432.4197974  | 0   | 0   | 0   | 4 | 7 | 8 |
| L249S | 2.255533647  | -50 | 0   | 0   | 4 | 7 | 8 |
| L249T | 2.204444709  | -10 | 0   | 0   | 4 | 7 | 8 |
| L249W | 0.885336346  | 20  | 0   | 0   | 4 | 7 | 8 |
| L249Y | 0.834071571  | 0   | 0   | 0   | 4 | 7 | 8 |
| L249V | 1.628334062  | 0   | 0   | 0   | 4 | 7 | 8 |
| A290A | 0            | 0   | 0   | 0   | 4 | 7 | 8 |
| A290R | 0.504601777  | -10 | 70  | -30 | 4 | 7 | 9 |
| A290N | 0.723215064  | -20 | 0   | -10 | 4 | 7 | 8 |
| A290D | 1.120206587  | -20 | 0   | 50  | 4 | 7 | 8 |
| A290C | 0.796192933  | 0   | 0   | -10 | 4 | 7 | 8 |
| A290Q | 0.86041541   | -20 | 0   | 20  | 4 | 7 | 8 |
| A290E | 0.987338204  | -20 | 0   | 50  | 4 | 7 | 8 |
| A290G | 1.482704634  | 0   | 0   | 0   | 4 | 7 | 8 |

|       |              |      |     |     |   |   |   |
|-------|--------------|------|-----|-----|---|---|---|
| A290H | 1.361392088  | -20  | 0   | 40  | 4 | 7 | 8 |
| A290I | 5.390960481  | 20   | 0   | -10 | 4 | 7 | 8 |
| A290L | -0.123682767 | 20   | 10  | -10 | 4 | 7 | 8 |
| A290K | 1.037420222  | -30  | 70  | -10 | 4 | 7 | 9 |
| A290M | 0.526912091  | 20   | 0   | 0   | 4 | 7 | 8 |
| A290F | 0.542257567  | 40   | 0   | -10 | 4 | 7 | 8 |
| A290P | 1125.794701  | 0    | 0   | -10 | 4 | 7 | 8 |
| A290S | 1.023275747  | -20  | 0   | -10 | 4 | 7 | 8 |
| A290T | 0.941858651  | -10  | 0   | 0   | 4 | 7 | 8 |
| A290W | 1.004867449  | 60   | 0   | -10 | 4 | 7 | 8 |
| A290Y | 0.616011644  | 20   | 10  | -10 | 4 | 7 | 8 |
| A290V | 3.577328926  | 0    | 0   | -10 | 4 | 7 | 8 |
| P293P | 0            | 0    | 0   | 0   | 4 | 7 | 8 |
| P293A | 1.067504566  | -10  | 0   | 0   | 4 | 7 | 8 |
| P293R | 0.133816822  | -110 | 40  | 0   | 3 | 7 | 8 |
| P293N | 1.035976962  | -110 | 0   | 0   | 3 | 7 | 8 |
| P293D | 1.328013011  | -110 | 0   | 0   | 3 | 7 | 8 |
| P293C | 1.023459389  | -10  | 0   | 0   | 4 | 7 | 8 |
| P293Q | 0.68896101   | -110 | 0   | 0   | 3 | 7 | 8 |
| P293E | 0.707244618  | -110 | -10 | 0   | 3 | 7 | 8 |
| P293G | 1.856066142  | -30  | 0   | 0   | 4 | 7 | 8 |
| P293H | 1.538806997  | -20  | -10 | 0   | 4 | 7 | 8 |
| P293I | 0.019388362  | 0    | 0   | 0   | 4 | 7 | 8 |
| P293L | -0.054958234 | 10   | 0   | 0   | 4 | 7 | 8 |
| P293K | 1.052286242  | -50  | 50  | 0   | 4 | 7 | 8 |
| P293M | 0.207329841  | 0    | 0   | 0   | 4 | 7 | 8 |
| P293F | 0.85928369   | 60   | 0   | 0   | 4 | 7 | 8 |
| P293S | 1.262504563  | -110 | 0   | 0   | 3 | 7 | 8 |
| P293T | 0.758316384  | -60  | 0   | 0   | 4 | 7 | 8 |
| P293W | 0.894564793  | 20   | 0   | 0   | 4 | 7 | 8 |
| P293Y | 0.963431749  | 30   | 0   | 0   | 4 | 7 | 8 |
| P293V | 0.022220093  | 0    | 0   | 0   | 4 | 7 | 8 |
| I295I | 0            | 0    | 0   | 0   | 4 | 7 | 8 |
| I295A | 2.023302934  | -10  | 0   | -40 | 4 | 6 | 8 |
| I295R | 0.859431366  | -110 | 10  | 0   | 3 | 7 | 8 |
| I295N | 1.99553434   | -50  | 0   | 0   | 4 | 7 | 8 |

|       |             |     |    |     |   |   |   |
|-------|-------------|-----|----|-----|---|---|---|
| I295D | 2.253890578 | -60 | 0  | 60  | 4 | 8 | 8 |
| I295C | 2.039158126 | -40 | 0  | -40 | 4 | 6 | 8 |
| I295Q | 1.479317877 | -50 | 0  | 0   | 4 | 7 | 8 |
| I295E | 1.916342451 | -50 | 0  | 40  | 4 | 8 | 8 |
| I295G | 2.763974997 | -20 | 0  | -40 | 4 | 6 | 8 |
| I295H | 1.957786738 | -50 | 0  | 50  | 4 | 8 | 8 |
| I295L | 0.751394736 | 0   | 0  | 0   | 4 | 7 | 8 |
| I295K | 1.623988688 | -50 | 40 | 0   | 4 | 7 | 9 |
| I295M | 1.176933426 | -10 | 0  | 0   | 4 | 7 | 8 |
| I295F | 0.704692173 | 0   | 0  | 0   | 4 | 7 | 8 |
| I295P | 82.9752419  | -10 | 0  | 0   | 4 | 7 | 8 |
| I295S | 2.240752554 | -40 | 0  | 0   | 4 | 7 | 8 |
| I295T | 1.789046233 | -50 | 0  | 0   | 4 | 7 | 8 |
| I295W | 0.879898913 | 0   | 0  | 0   | 4 | 7 | 8 |
| I295Y | 0.974483428 | -10 | 0  | 0   | 4 | 7 | 8 |
| I295V | 1.08541018  | -10 | 0  | 0   | 4 | 7 | 8 |
| I297I | 0           | 0   | 0  | 0   | 4 | 7 | 8 |
| I297A | 2.217895682 | -10 | 0  | -40 | 4 | 6 | 8 |
| I297R | 2.275249985 | -30 | 0  | 0   | 4 | 7 | 8 |
| I297N | 2.026114101 | -10 | 0  | 0   | 4 | 7 | 8 |
| I297D | 2.536684628 | -10 | 0  | -40 | 4 | 6 | 8 |
| I297C | 2.030322076 | -10 | 0  | -40 | 4 | 6 | 8 |
| I297Q | 2.05753488  | -20 | 0  | 0   | 4 | 7 | 8 |
| I297E | 2.390634188 | -20 | 0  | 80  | 4 | 8 | 8 |
| I297G | 3.133241422 | -10 | 10 | -40 | 4 | 6 | 8 |
| I297H | 2.838109053 | -20 | 0  | 70  | 4 | 8 | 8 |
| I297L | 1.592453204 | 0   | 0  | 0   | 4 | 7 | 8 |
| I297K | 2.991622117 | -30 | 0  | 0   | 4 | 7 | 8 |
| I297M | 1.846678482 | -10 | 0  | 0   | 4 | 7 | 8 |
| I297F | 2.136438321 | 10  | 0  | 0   | 4 | 7 | 8 |
| I297P | 23.19278575 | -10 | 0  | -40 | 4 | 6 | 8 |
| I297S | 2.408419279 | -10 | 0  | -40 | 4 | 6 | 8 |
| I297T | 1.925662195 | -10 | 0  | -40 | 4 | 6 | 8 |
| I297W | 3.220605793 | 40  | 0  | -40 | 4 | 6 | 8 |
| I297Y | 1.83253497  | 0   | 0  | 0   | 4 | 7 | 8 |
| I297V | 1.132516364 | -10 | 0  | 0   | 4 | 7 | 8 |



|       |             |     |   |     |   |   |   |
|-------|-------------|-----|---|-----|---|---|---|
| F328F | 0           | 0   | 0 | 0   | 4 | 7 | 8 |
| F328A | 2.983770293 | 30  | 0 | 0   | 4 | 7 | 8 |
| F328R | 1.92821213  | -20 | 0 | 0   | 4 | 7 | 8 |
| F328N | 2.841497587 | -10 | 0 | 0   | 4 | 7 | 8 |
| F328D | 2.925697332 | -10 | 0 | 0   | 4 | 7 | 8 |
| F328C | 2.868945471 | 20  | 0 | 0   | 4 | 7 | 8 |
| F328Q | 2.543589049 | 0   | 0 | 0   | 4 | 7 | 8 |
| F328E | 2.859739658 | -20 | 0 | 0   | 4 | 7 | 8 |
| F328G | 3.985298561 | 40  | 0 | -40 | 4 | 6 | 8 |
| F328H | 2.421494646 | -10 | 0 | 0   | 4 | 7 | 8 |
| F328I | 22.58227036 | 10  | 0 | 0   | 4 | 7 | 8 |
| F328L | 1.980802214 | 0   | 0 | 0   | 4 | 7 | 8 |
| F328K | 2.331466483 | -20 | 0 | 0   | 4 | 7 | 8 |
| F328M | 1.87006816  | -10 | 0 | 0   | 4 | 7 | 8 |
| F328P | 119.9410066 | 30  | 0 | 0   | 4 | 7 | 8 |
| F328S | 3.206147808 | 0   | 0 | 0   | 4 | 7 | 8 |
| F328T | 2.506706817 | 20  | 0 | 0   | 4 | 7 | 8 |
| F328W | 1.162626502 | 0   | 0 | 0   | 4 | 7 | 8 |
| F328Y | 0.941289061 | 0   | 0 | 0   | 4 | 7 | 8 |
| F328V | 2.672337747 | 20  | 0 | 0   | 4 | 7 | 8 |

<sup>1</sup> *dStability* (kcal/mol) is defined as the change in stability with no amino acid substitution as zero.

<sup>2</sup> The patch area (Å<sup>2</sup>) of VP35 IID with the wildtype amino acid is zero, and the difference in patch area with each amino acid substitution is shown.

Table S4: Summary of patch analysis, minigenome replication, NP-interaction, and IFN- $\beta$  promoter-suppression data

| Hydrophobic patch | Effect on patch | VP35            | Minigenome replication | Interaction with NP | Suppression of IFN-β promoter |
|-------------------|-----------------|-----------------|------------------------|---------------------|-------------------------------|
| #1                | Disrupted       | Wildtype        | ++                     | +                   | +++                           |
|                   |                 | R225E           | -                      | ND <sup>1</sup>     | +++                           |
|                   |                 | F235A           | +++                    | ND                  | +++                           |
|                   |                 | F235G           | ++                     | +                   | +++                           |
|                   |                 | F235S           | ++                     | ND                  | +++                           |
|                   |                 | <b>F235L</b>    | ++                     | ND                  | +++                           |
|                   |                 | <b>F235Y</b>    | ++                     | ND                  | +++                           |
| #2                | Disrupted       | A238Q           | ++                     | +                   | ±                             |
|                   | <b>Retained</b> | <b>A238P</b>    | +++                    | ND                  | +++                           |
|                   | Disrupted       | F239Q           | ++                     | ND                  | -                             |
|                   |                 | F239N           | +++                    | ND                  | -                             |
|                   |                 | F239H           | ++                     | ND                  | -                             |
|                   |                 | F239K           | -                      | -                   | -                             |
|                   |                 | F239Y           | ++                     | +                   | +++                           |
|                   |                 | F239A           | ++                     | ND                  | -                             |
|                   |                 | <b>Retained</b> | <b>F239V</b>           | ++                  | ND                            |
|                   | Disrupted       | I278T           | ++                     | ND                  | +++                           |
| #3                | Disrupted       | P293N           | -                      | -                   | ±                             |
|                   |                 | P293D           | -                      | -                   | ±                             |
|                   |                 | P293Q           | -                      | -                   | ±                             |
|                   |                 | P293S           | ±                      | -                   | -                             |
|                   | <b>Retained</b> | <b>P293I</b>    | -                      | ND                  | -                             |
|                   |                 | <b>I295L</b>    | ±                      | ND                  | -                             |

<sup>1</sup>ND: Not done

<sup>2</sup>Patch-retained mutants are shown in boldface.

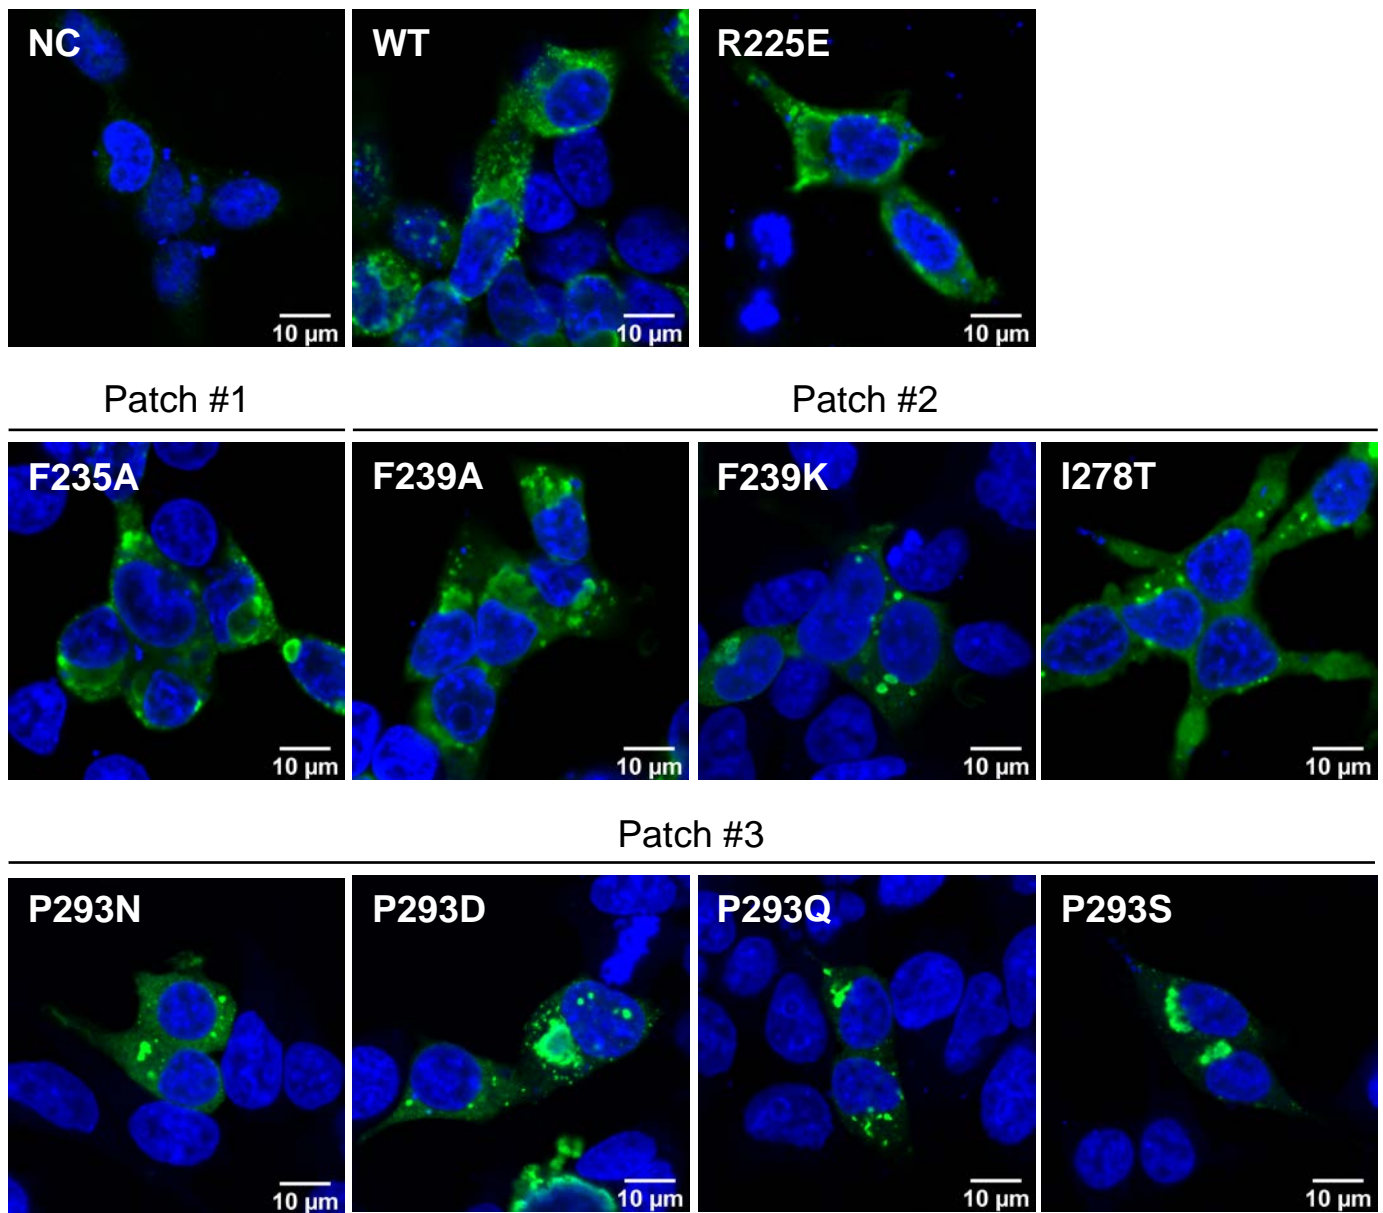

### Figure S1: Subcellular localization of VP35 mutants

Subcellular localization of VP35 was confirmed by immunofluorescence analysis. HEK293T cells were transfected with an empty vector (NC), WT, or mutant VP35-expressing plasmids. HA-tagged WT or VP35 mutants were detected with a monoclonal anti-HA antibody (Abcam) and Alexa488-labeled anti-mouse IgG (H+L)(Life Technologies). DAPI (blue) was used for nuclear staining.
